# Supplementary material
Source: PubMed Central journal article supplement (PMC9336538)
Supplement: NIHMS1815485-supplement-Supplementary_Figure_1.pdf [file NIHMS1815485-supplement-Supplementary_Figure_1.pdf]

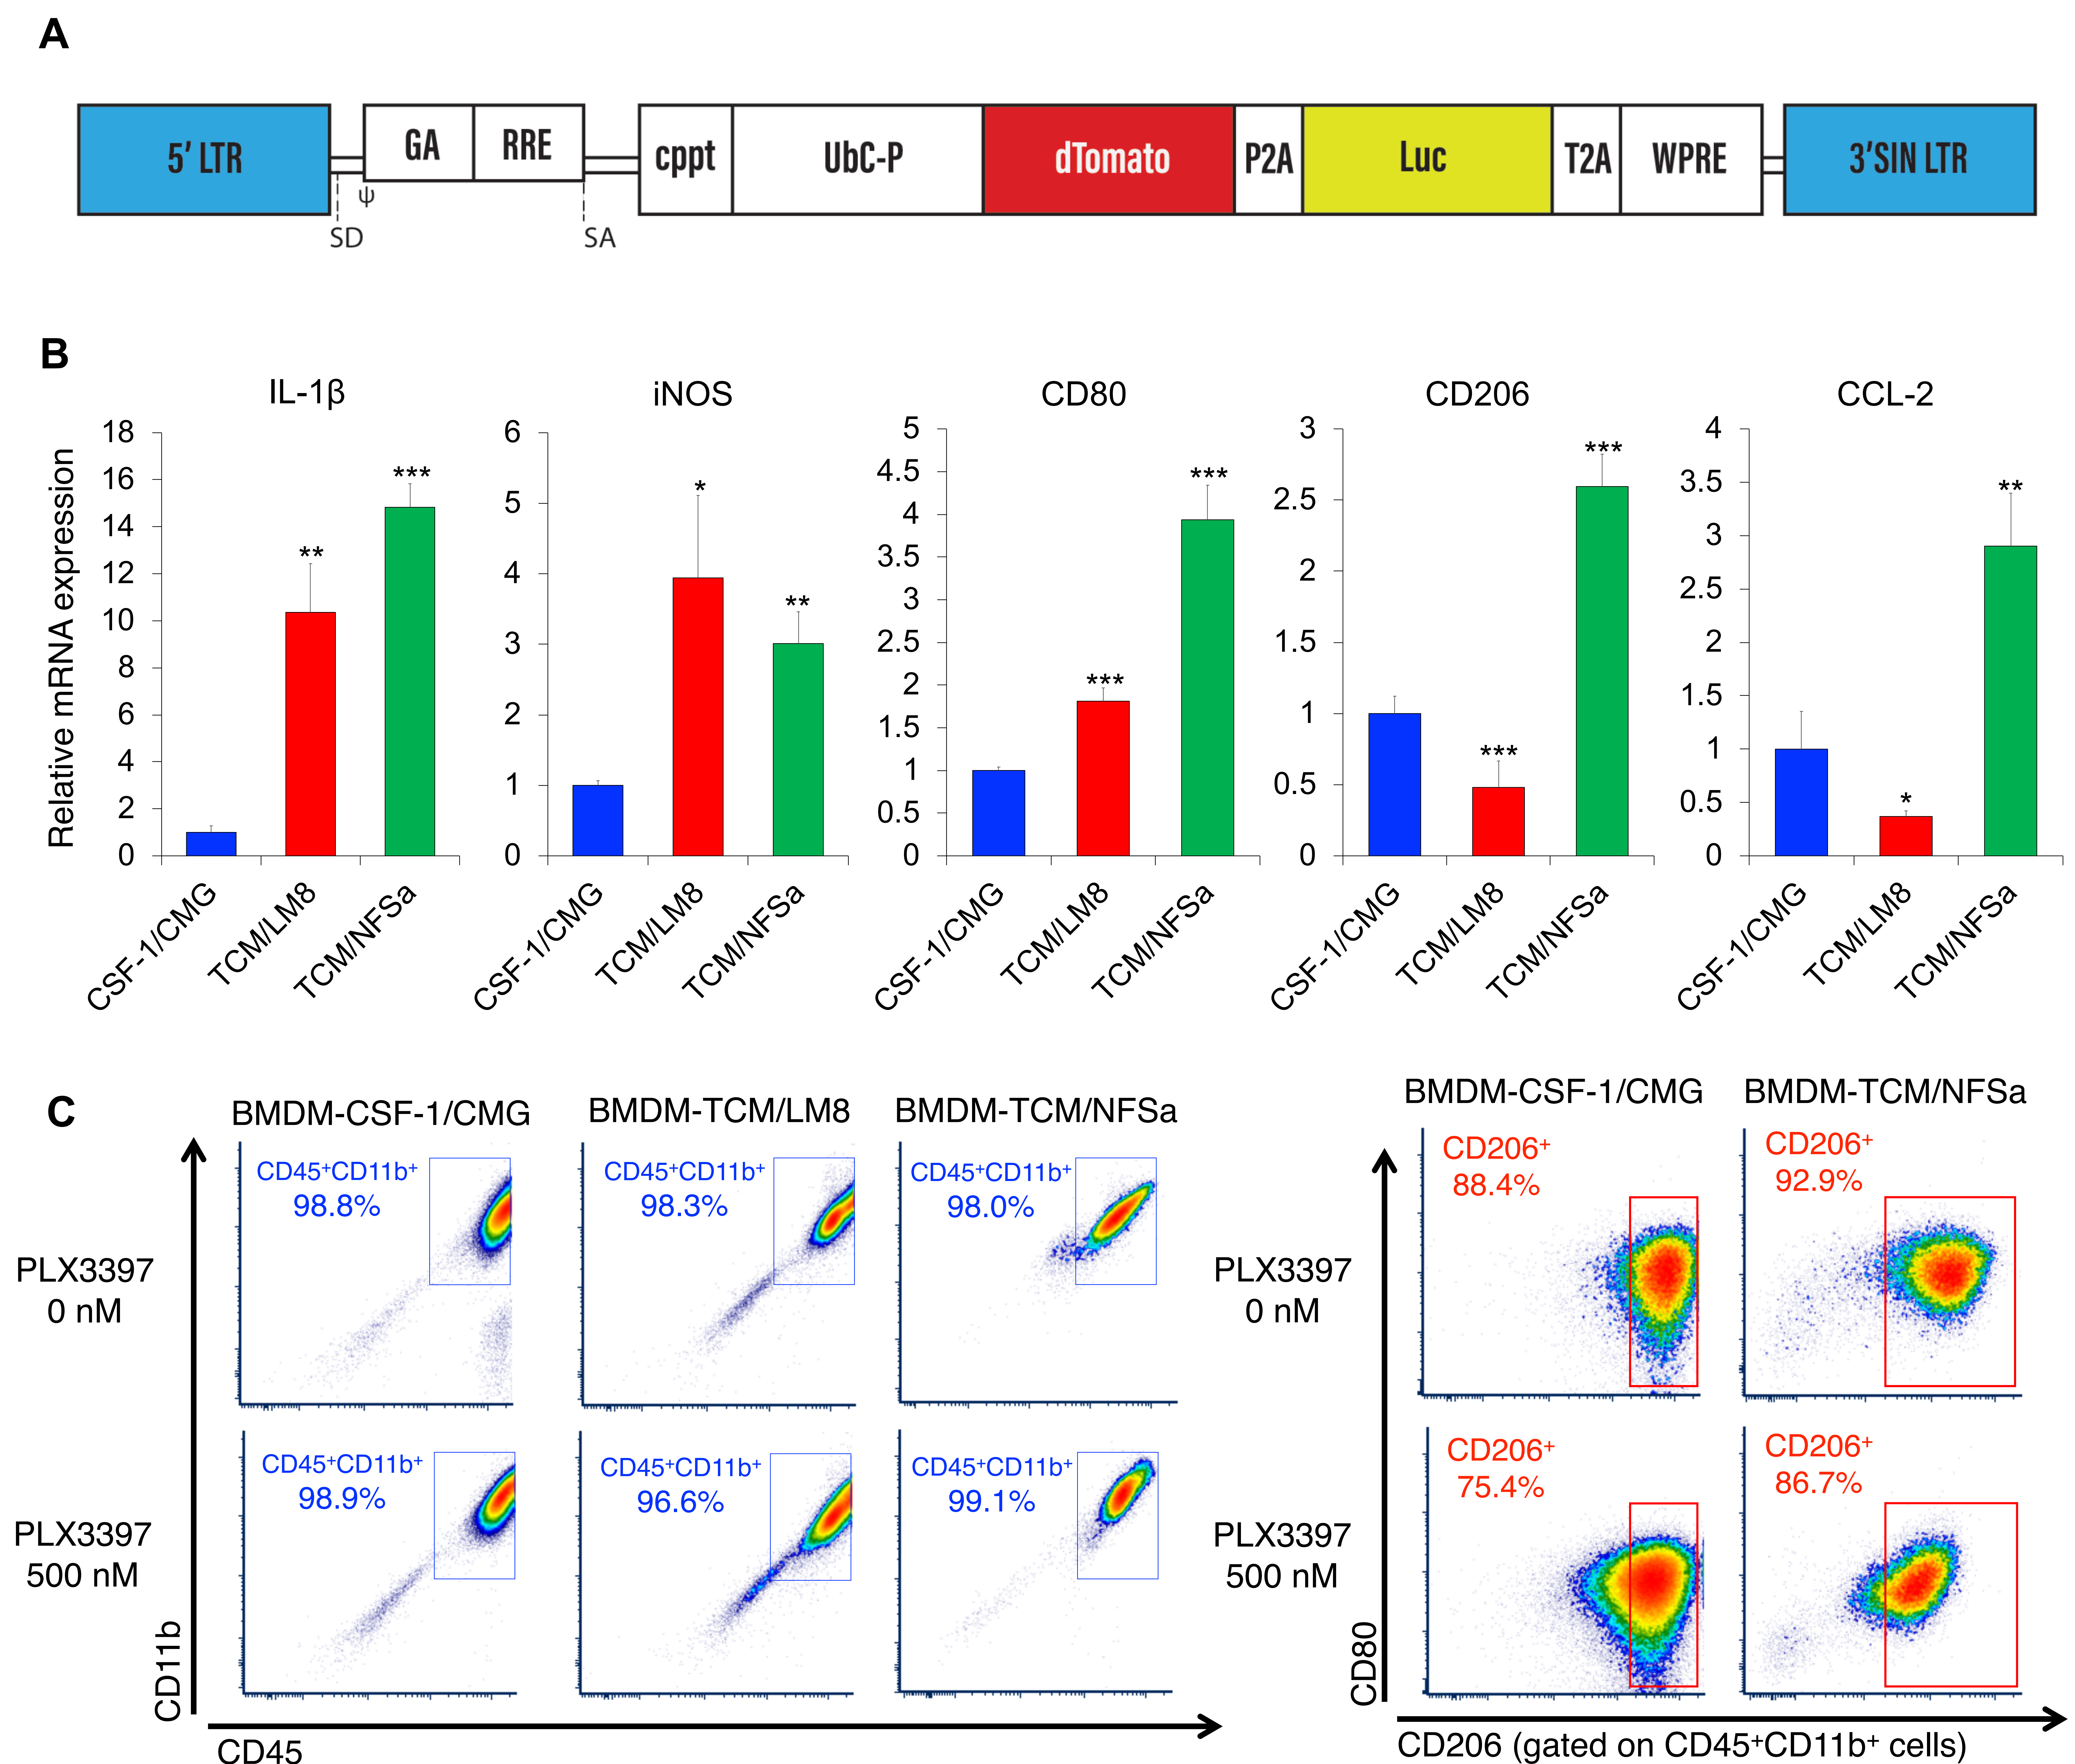

**Supplementary Figure 1.** A. The plasmid #48688 contains the following elements: 5' LTR, Chimeric Rous sarcoma virus (RSV)-HIV 5' long terminal repeat; SD, splice donor;  $\psi$ =packaging signal; GA, truncated gag sequence; RRE, Rev-Responsive Element; SA, splice acceptor; cppt, central polypurine tract; UbC-P, Ubiquitin C promoter; dTomato, red fluorescent dimer tomato (with 5' Kozak sequence, GCCACC[ATGG]); P2A, porcine teschovirus 2A element; adapted from Szymczak et al (2004); luc, firefly luciferase; T2A, *Thosea asigna* virus 2A element adapted from Szymczak et al (2004); WPRE, woodchuck hepatitis virus posttranscriptional regulatory element and 3'SIN-LTR, U3-deleted 3' LTR to generate self-inactivating (SIN) vector. B. Quantification of mRNA expression of M1- and M2-related genes in BMDM-CSF-1, BMDM-LM8, and BMDM-NFSa. HPRT was used as an internal control. Data are presented as mean  $\pm$  SD (n = 3 per group). \*,  $p < 0.01$ ; \*\*,  $p < 0.001$ ; \*\*\*,  $p < 0.0001$ ; Student *t* test. C. Left; surface marker profile of BMDM-TAMs produced by CSF-1/CMG, TCM/LM8, and TCM/NFSa, assessed by flow cytometry. A, Cellular distribution of CD45<sup>+</sup>/CD11b<sup>+</sup> cells. PLX3397 treatment did not affect the cellular distribution of CD45<sup>+</sup>/CD11b<sup>+</sup> cells in BMDMs-CSF-1, BMDMs-LM8, and BMDMs-NFSa. Right; Cellular distribution of CD45<sup>+</sup>/CD11b<sup>+</sup>CD206<sup>+</sup>/CD45<sup>+</sup>/CD11b<sup>+</sup>CD80<sup>+</sup> cells. The number of CD45<sup>+</sup>/CD11b<sup>+</sup>CD206<sup>+</sup> decreased by PLX3397 at a dose of 500 nM in BMDMs-CSF-1 and BMDMs-NFSa.
