# Supplementary material
Source: PubMed Central journal article supplement (PMC9336538)
Supplement: NIHMS1815485-supplement-Supplementary_Figure_2.pdf [file NIHMS1815485-supplement-Supplementary_Figure_2.pdf]

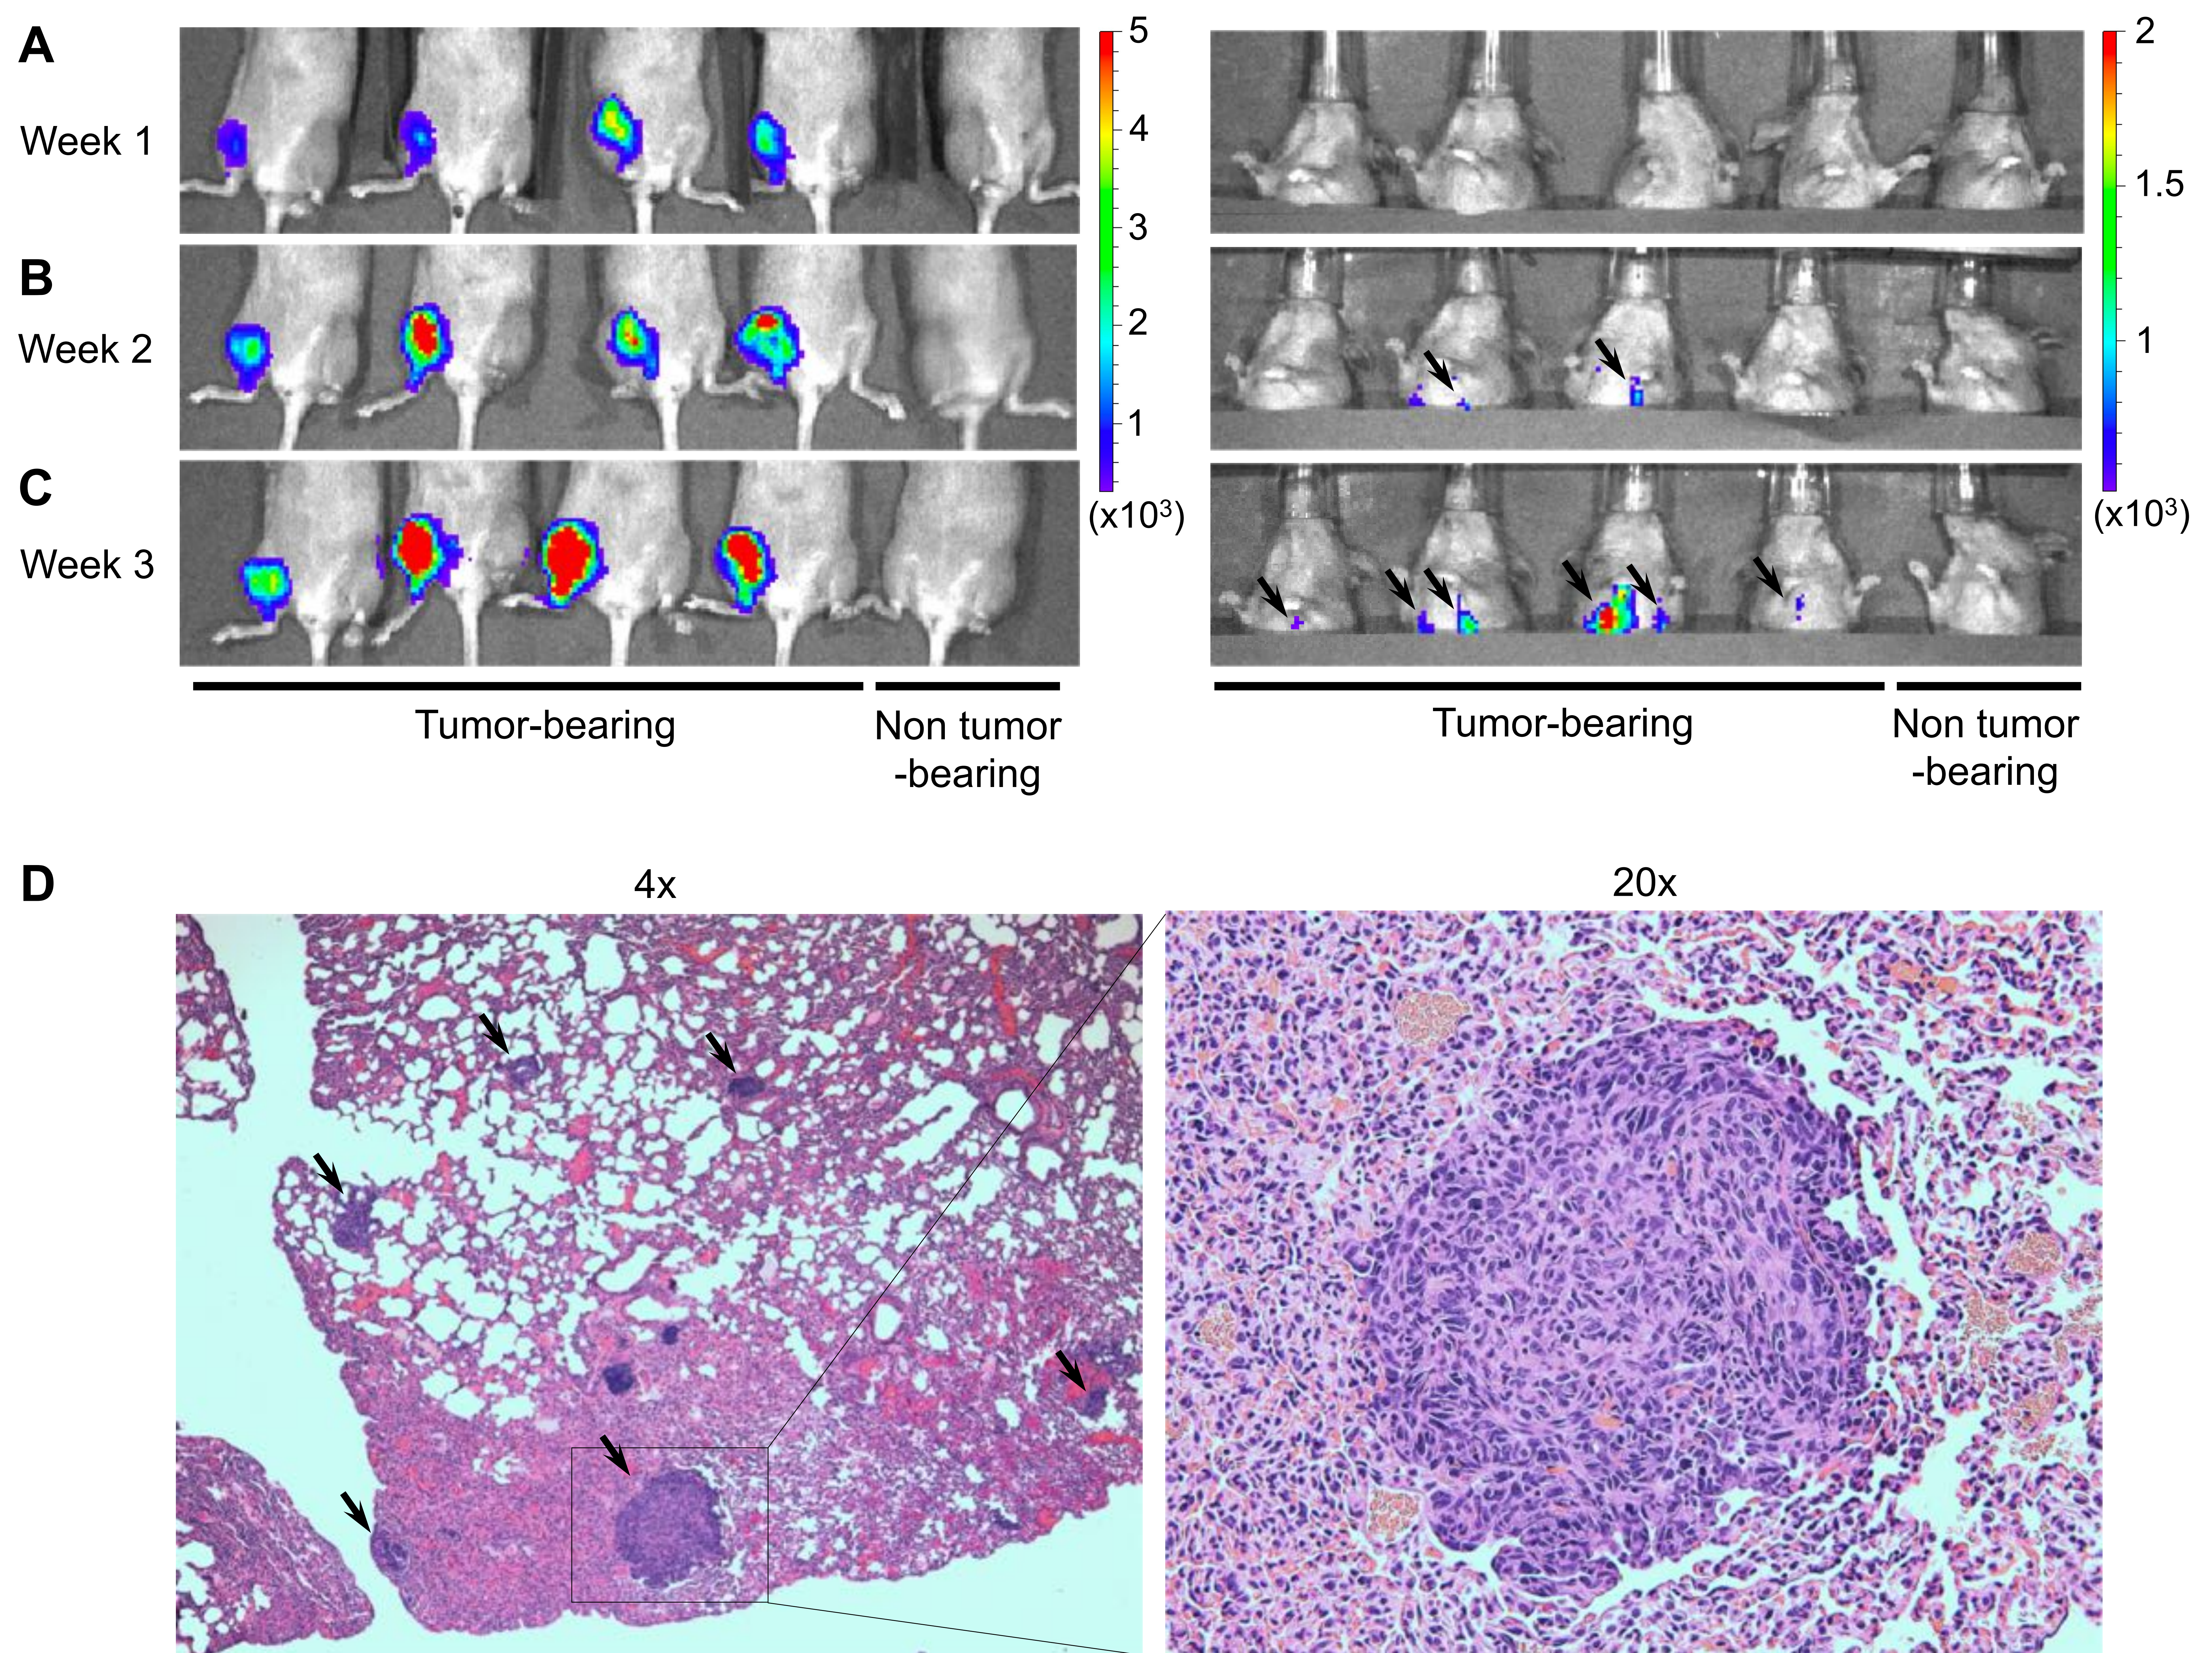

**Supplementary Figure 2.** Spontaneous lung metastasis of LM8 osteosarcoma mouse model. Bioluminescent images of mouse inoculated with LM8-luc cells and histological evaluation of the primary tumors and lung metastasis. A. Five days after inoculation of  $1.0 \times 10^6$  LM8-luc cells, the signal from labeled cells was localized in the inoculation site of the right proximal tibia of the mouse. B. At 2 weeks after inoculation, a first luminous signal was evident at the pulmonary area (arrows). C. At 3 weeks after inoculation, all mice exhibited luminous signal at the pulmonary area. D. Many nodules (arrows) were seen at the surface of resected lungs (left), and they were confirmed microscopically as an osteosarcoma metastatic lesion (right).
