# Supplementary material
Source: PubMed Central journal article supplement (PMC9336538)
Supplement: NIHMS1815485-supplement-Supplementary_Figure_3.pdf [file NIHMS1815485-supplement-Supplementary_Figure_3.pdf]

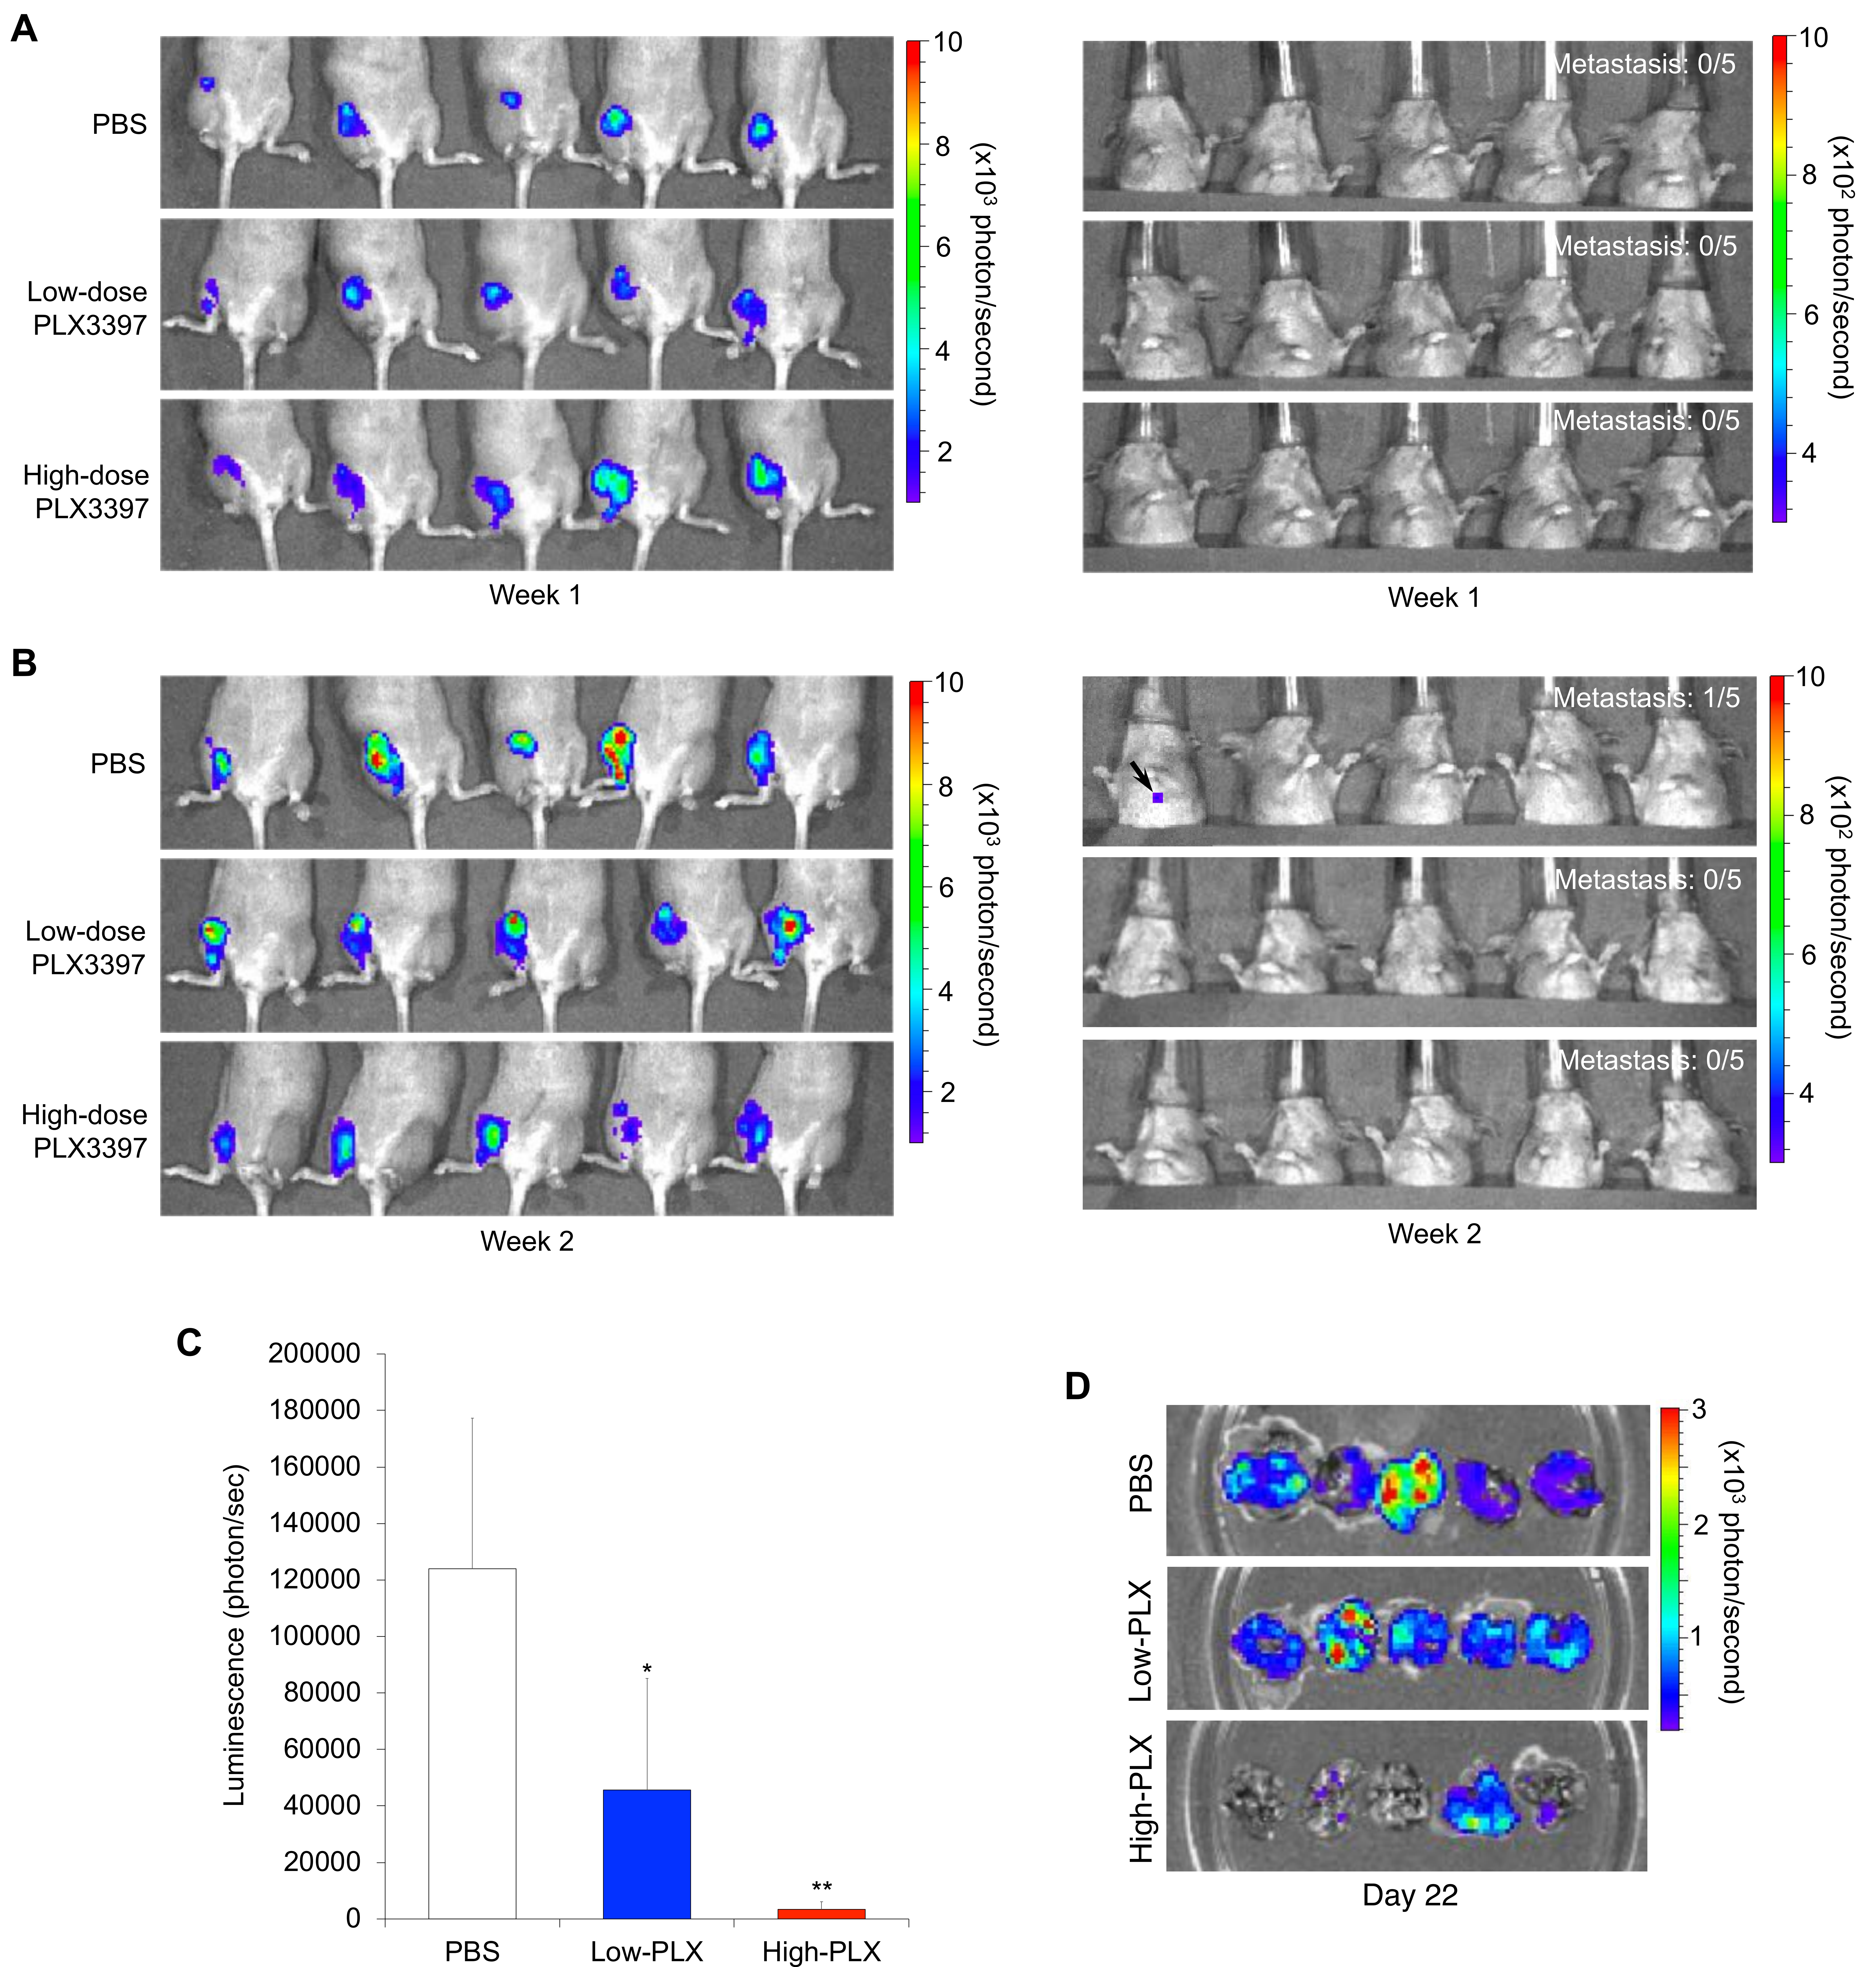

**Supplementary Figure 3.** CSF-1R inhibition by PLX3397 blocks LM8-luc tumor growth and lung metastasis in orthotopic osteosarcoma mouse model. A. Luminescence intensity from the primary tumors (left) and chest lesions (right) of each treatment group measured on week 1 (day 5) using an IVIS. B. Luminescence intensity from the primary tumors (left) and chest lesions (right) of each treatment group measured on week 2 (day 12) using an IVIS. C. Signal intensity from the chest lesions of mice on week 3 (day 19). \*,  $p < 0.05$ , \*\*,  $p < 0.01$ ; Student  $t$  test, in comparison with control PBS group. D. Luminescence intensity from the resected lungs of each treatment group.
