# Supplementary material
Source: PubMed Central journal article supplement (PMC9336538)
Supplement: NIHMS1815485-supplement-Supplementary_Figure_4.pdf [file NIHMS1815485-supplement-Supplementary_Figure_4.pdf]

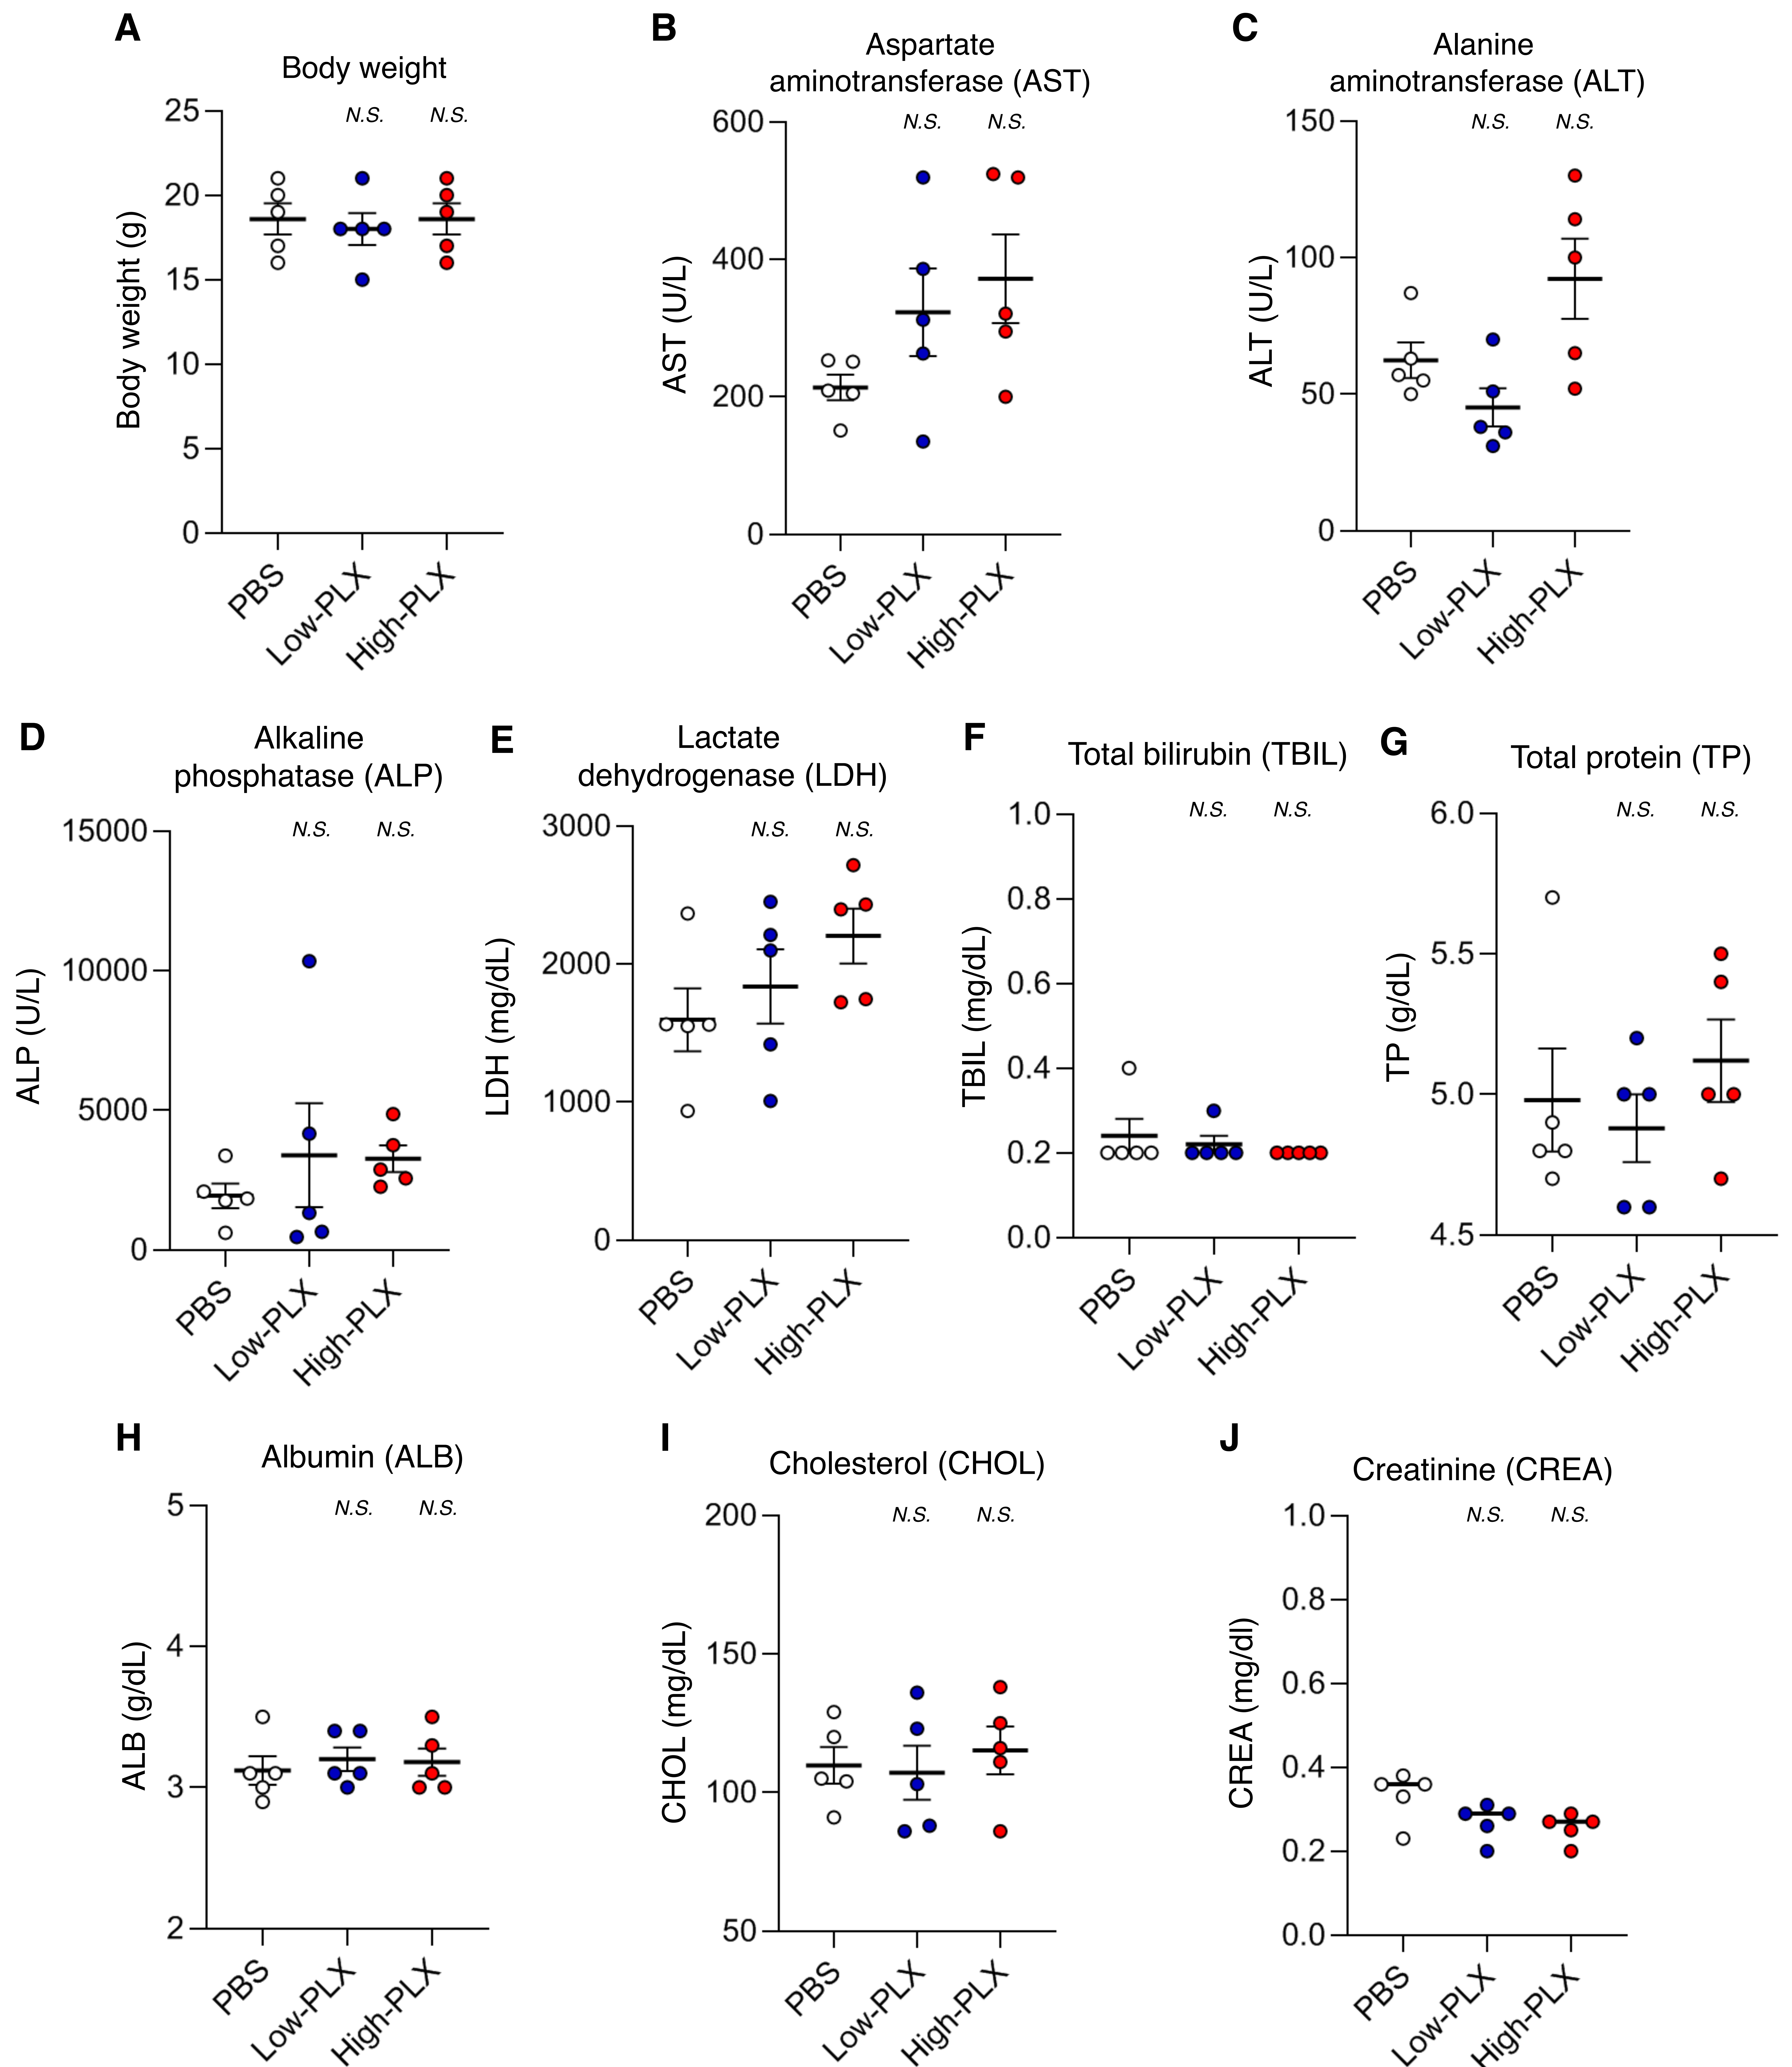

**Supplementary Figure 4.** Toxicity assessment. Body weight and blood chemistry were assessed for each treatment group at the end of therapeutic experiments (day 22). A. Body weight. B. Aspartate aminotransferase. C. Alanine aminotransferase. D. Alkaline phosphatase. E. Lactate dehydrogenase. F. Total bilirubin. G. Total protein. H. Albumin. I. Cholesterol. J. Creatinine. These data showed no significant difference between treatment groups. Data are presented as mean  $\pm$  s.e.m. ( $n = 5$  per group). *N.S.*, not significant; Student *t* test in comparison with control PBS group.
