# Supplementary material
Source: PubMed Central journal article supplement (PMC9336538)
Supplement: NIHMS1815485-supplement-Supplementary_Figure_5.pdf [file NIHMS1815485-supplement-Supplementary_Figure_5.pdf]

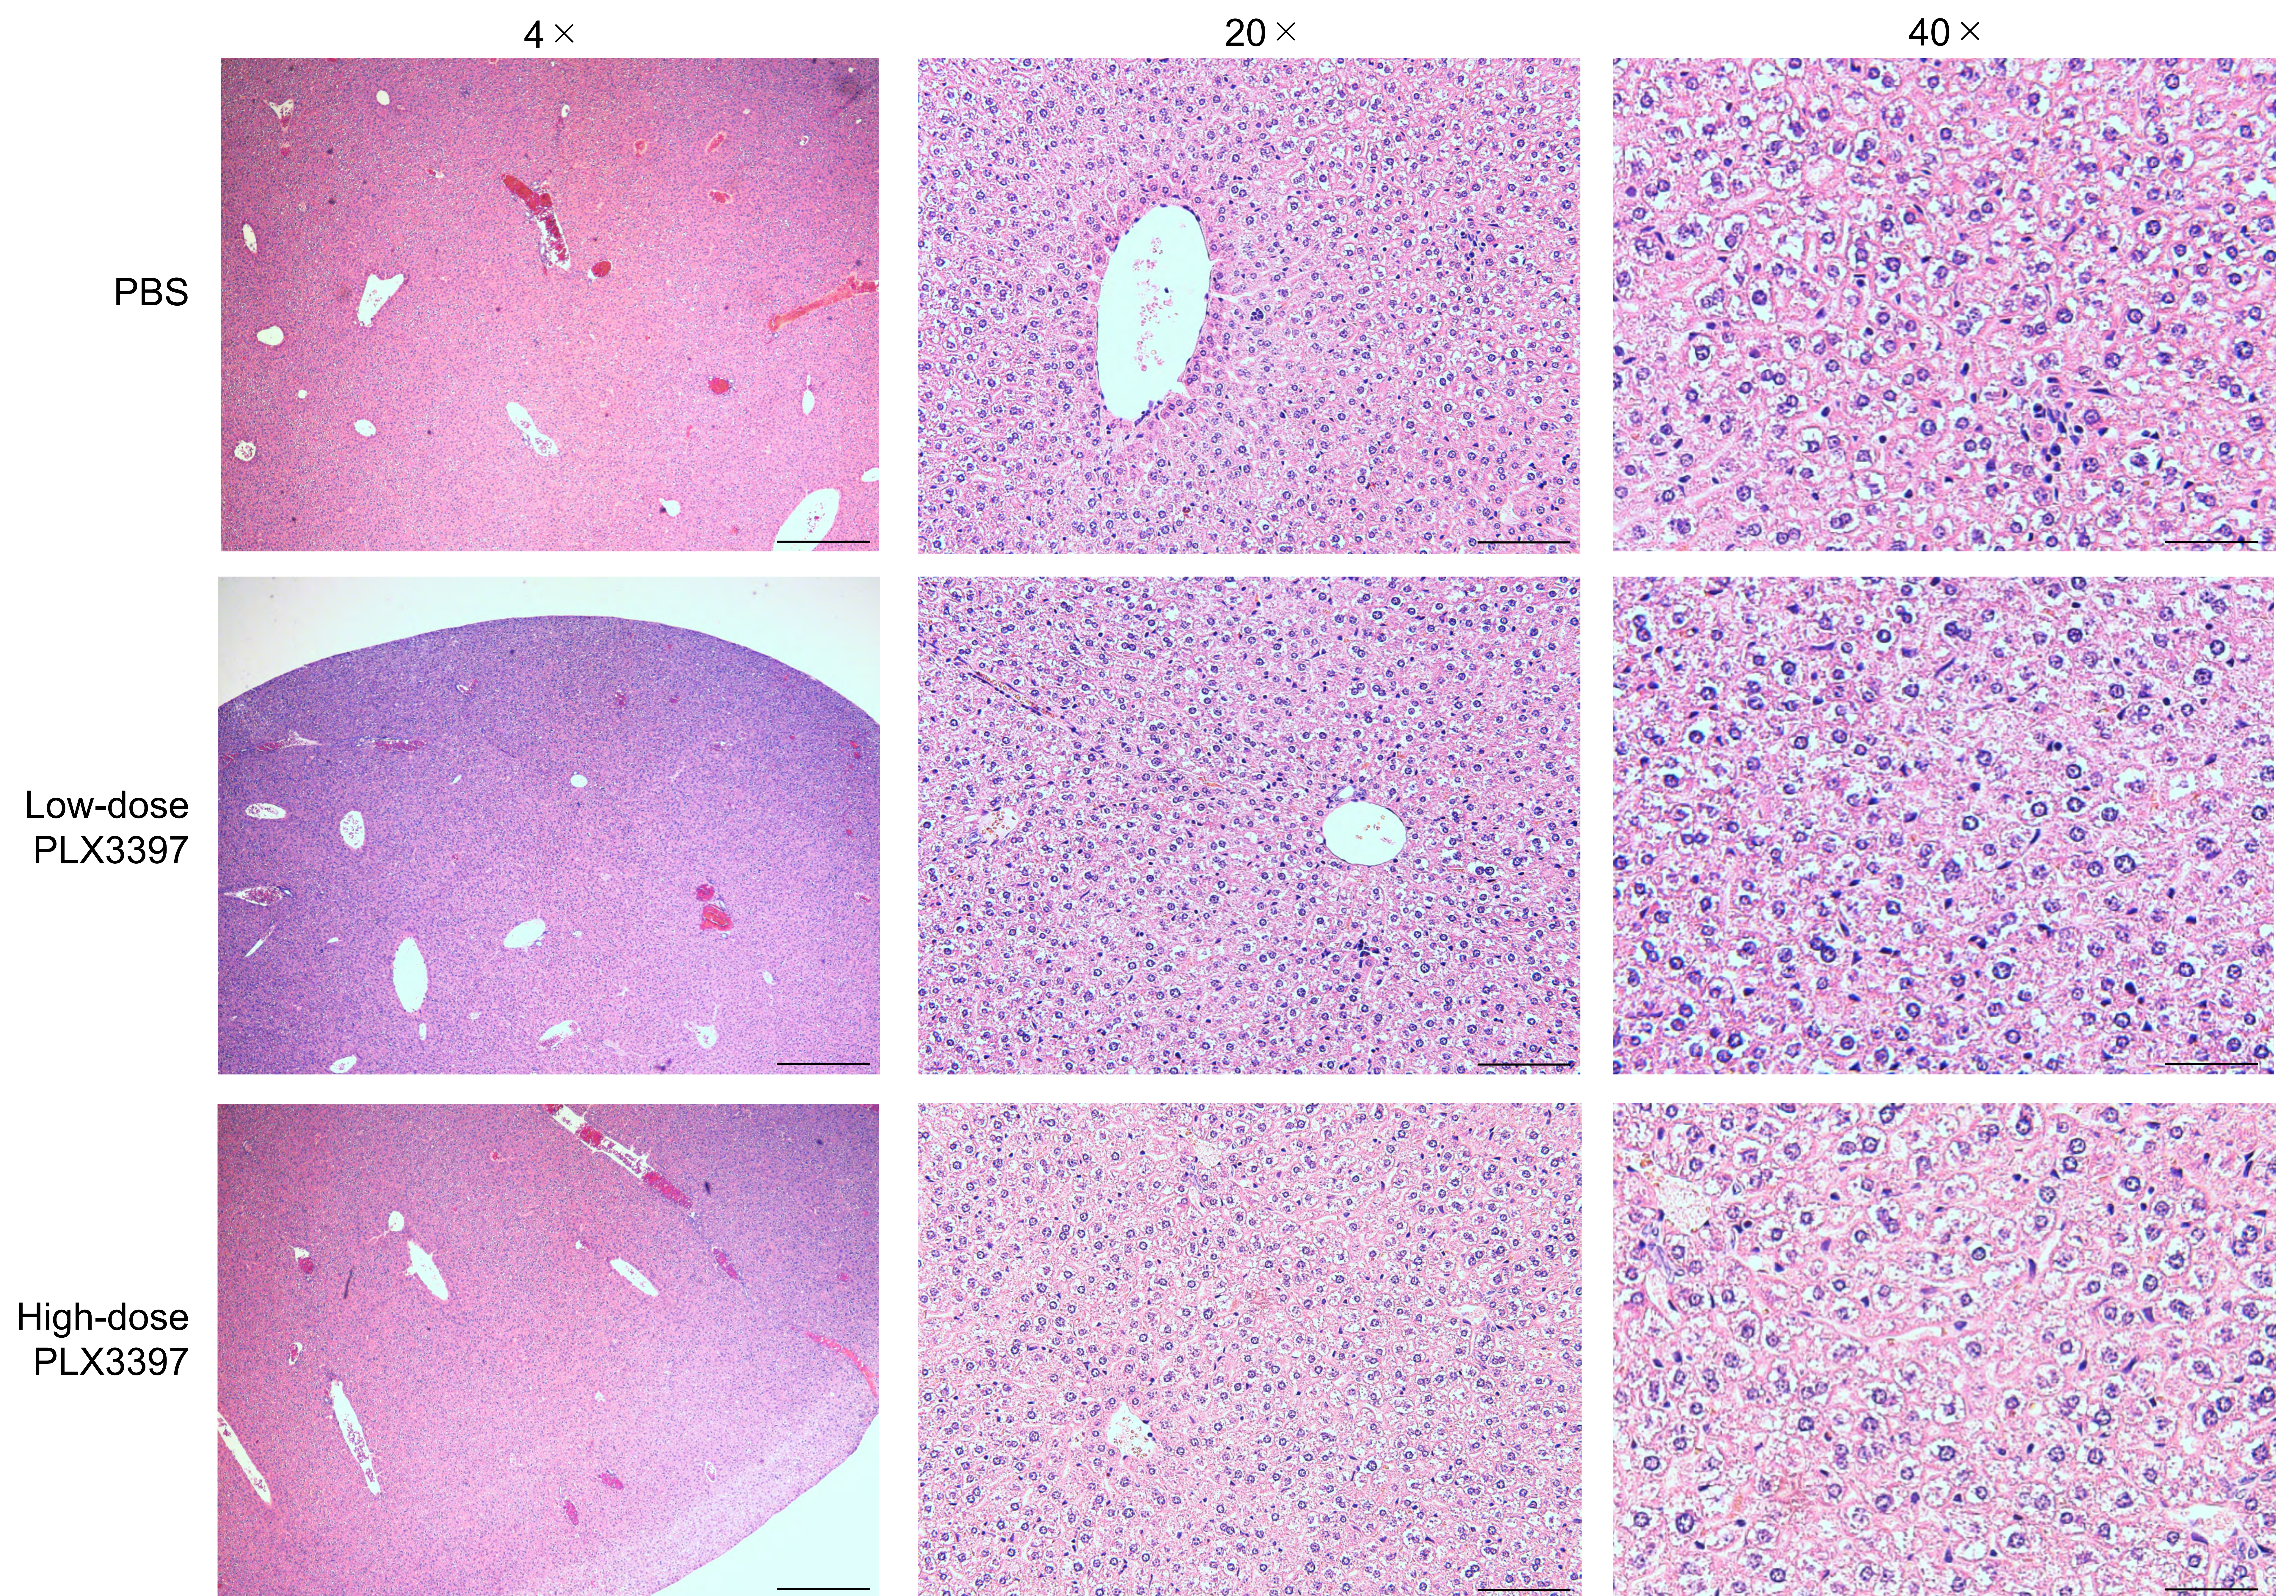

**Supplementary Figure 5.** Histopathological examination on H&E-stained sections from the livers of the LM8-luc-bearing mice. These samples revealed no evidence of necrosis, fibrosis, steatosis, inflammation, or biliary changes in any of the three groups. Scale bars, 200  $\mu\text{m}$  (left), 40  $\mu\text{m}$  (middle), and 20  $\mu\text{m}$  (right) .
