# Supplementary material
Source: PubMed Central journal article supplement (PMC9336538)
Supplement: NIHMS1815485-supplement-Supplementary_Figure_6.pdf [file NIHMS1815485-supplement-Supplementary_Figure_6.pdf]

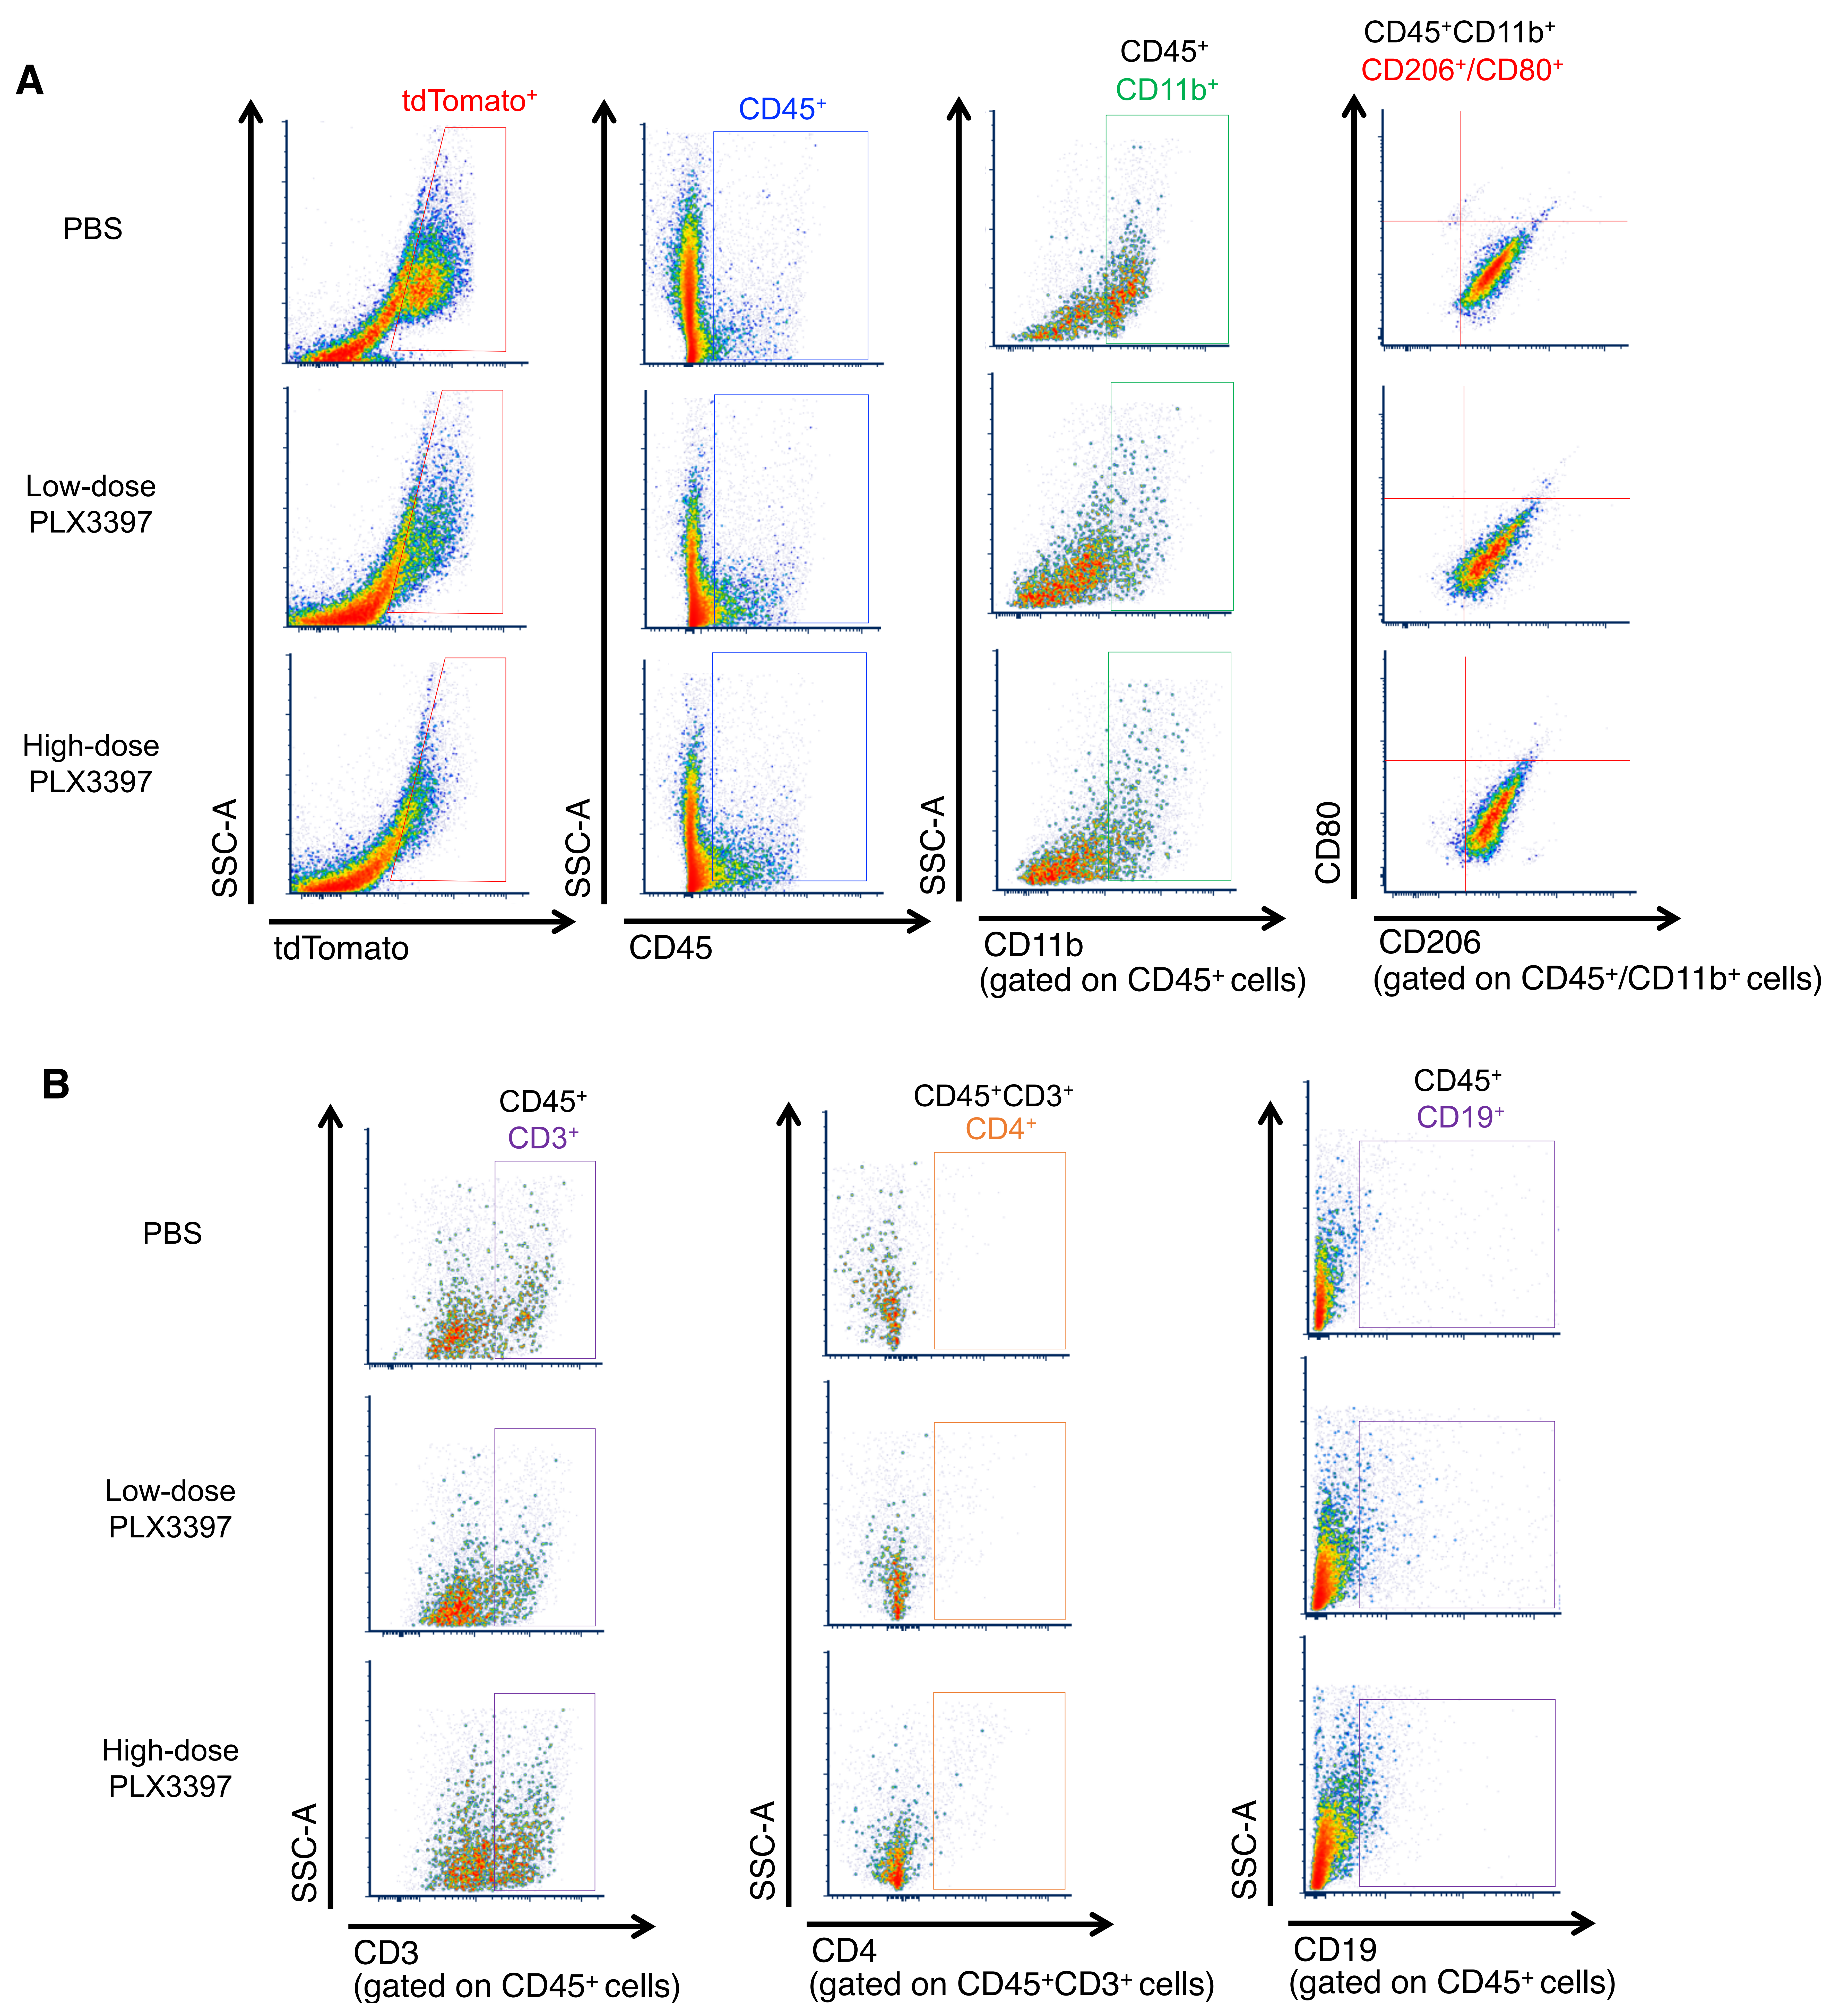

**Supplementary Figure 6.** Flow cytometry analysis of the dissociated LM8 tumor cells in each treatment group. A, Representative flow data showing tdTomato<sup>+</sup>, CD45<sup>+</sup>, CD45<sup>+</sup>11b<sup>+</sup>, and CD206<sup>+</sup>/CD80<sup>+</sup>. B, Representative flow data showing CD45<sup>+</sup>CD3<sup>+</sup>, CD45<sup>+</sup>CD3<sup>+</sup>CD4<sup>+</sup>, and CD45<sup>+</sup>CD19<sup>+</sup>. All flow data analyzed are shown in **Figure 5**.
