# Supplementary material
Source: PubMed Central journal article supplement (PMC9336538)
Supplement: NIHMS1815485-supplement-Supplementary_Figure_7.pdf [file NIHMS1815485-supplement-Supplementary_Figure_7.pdf]

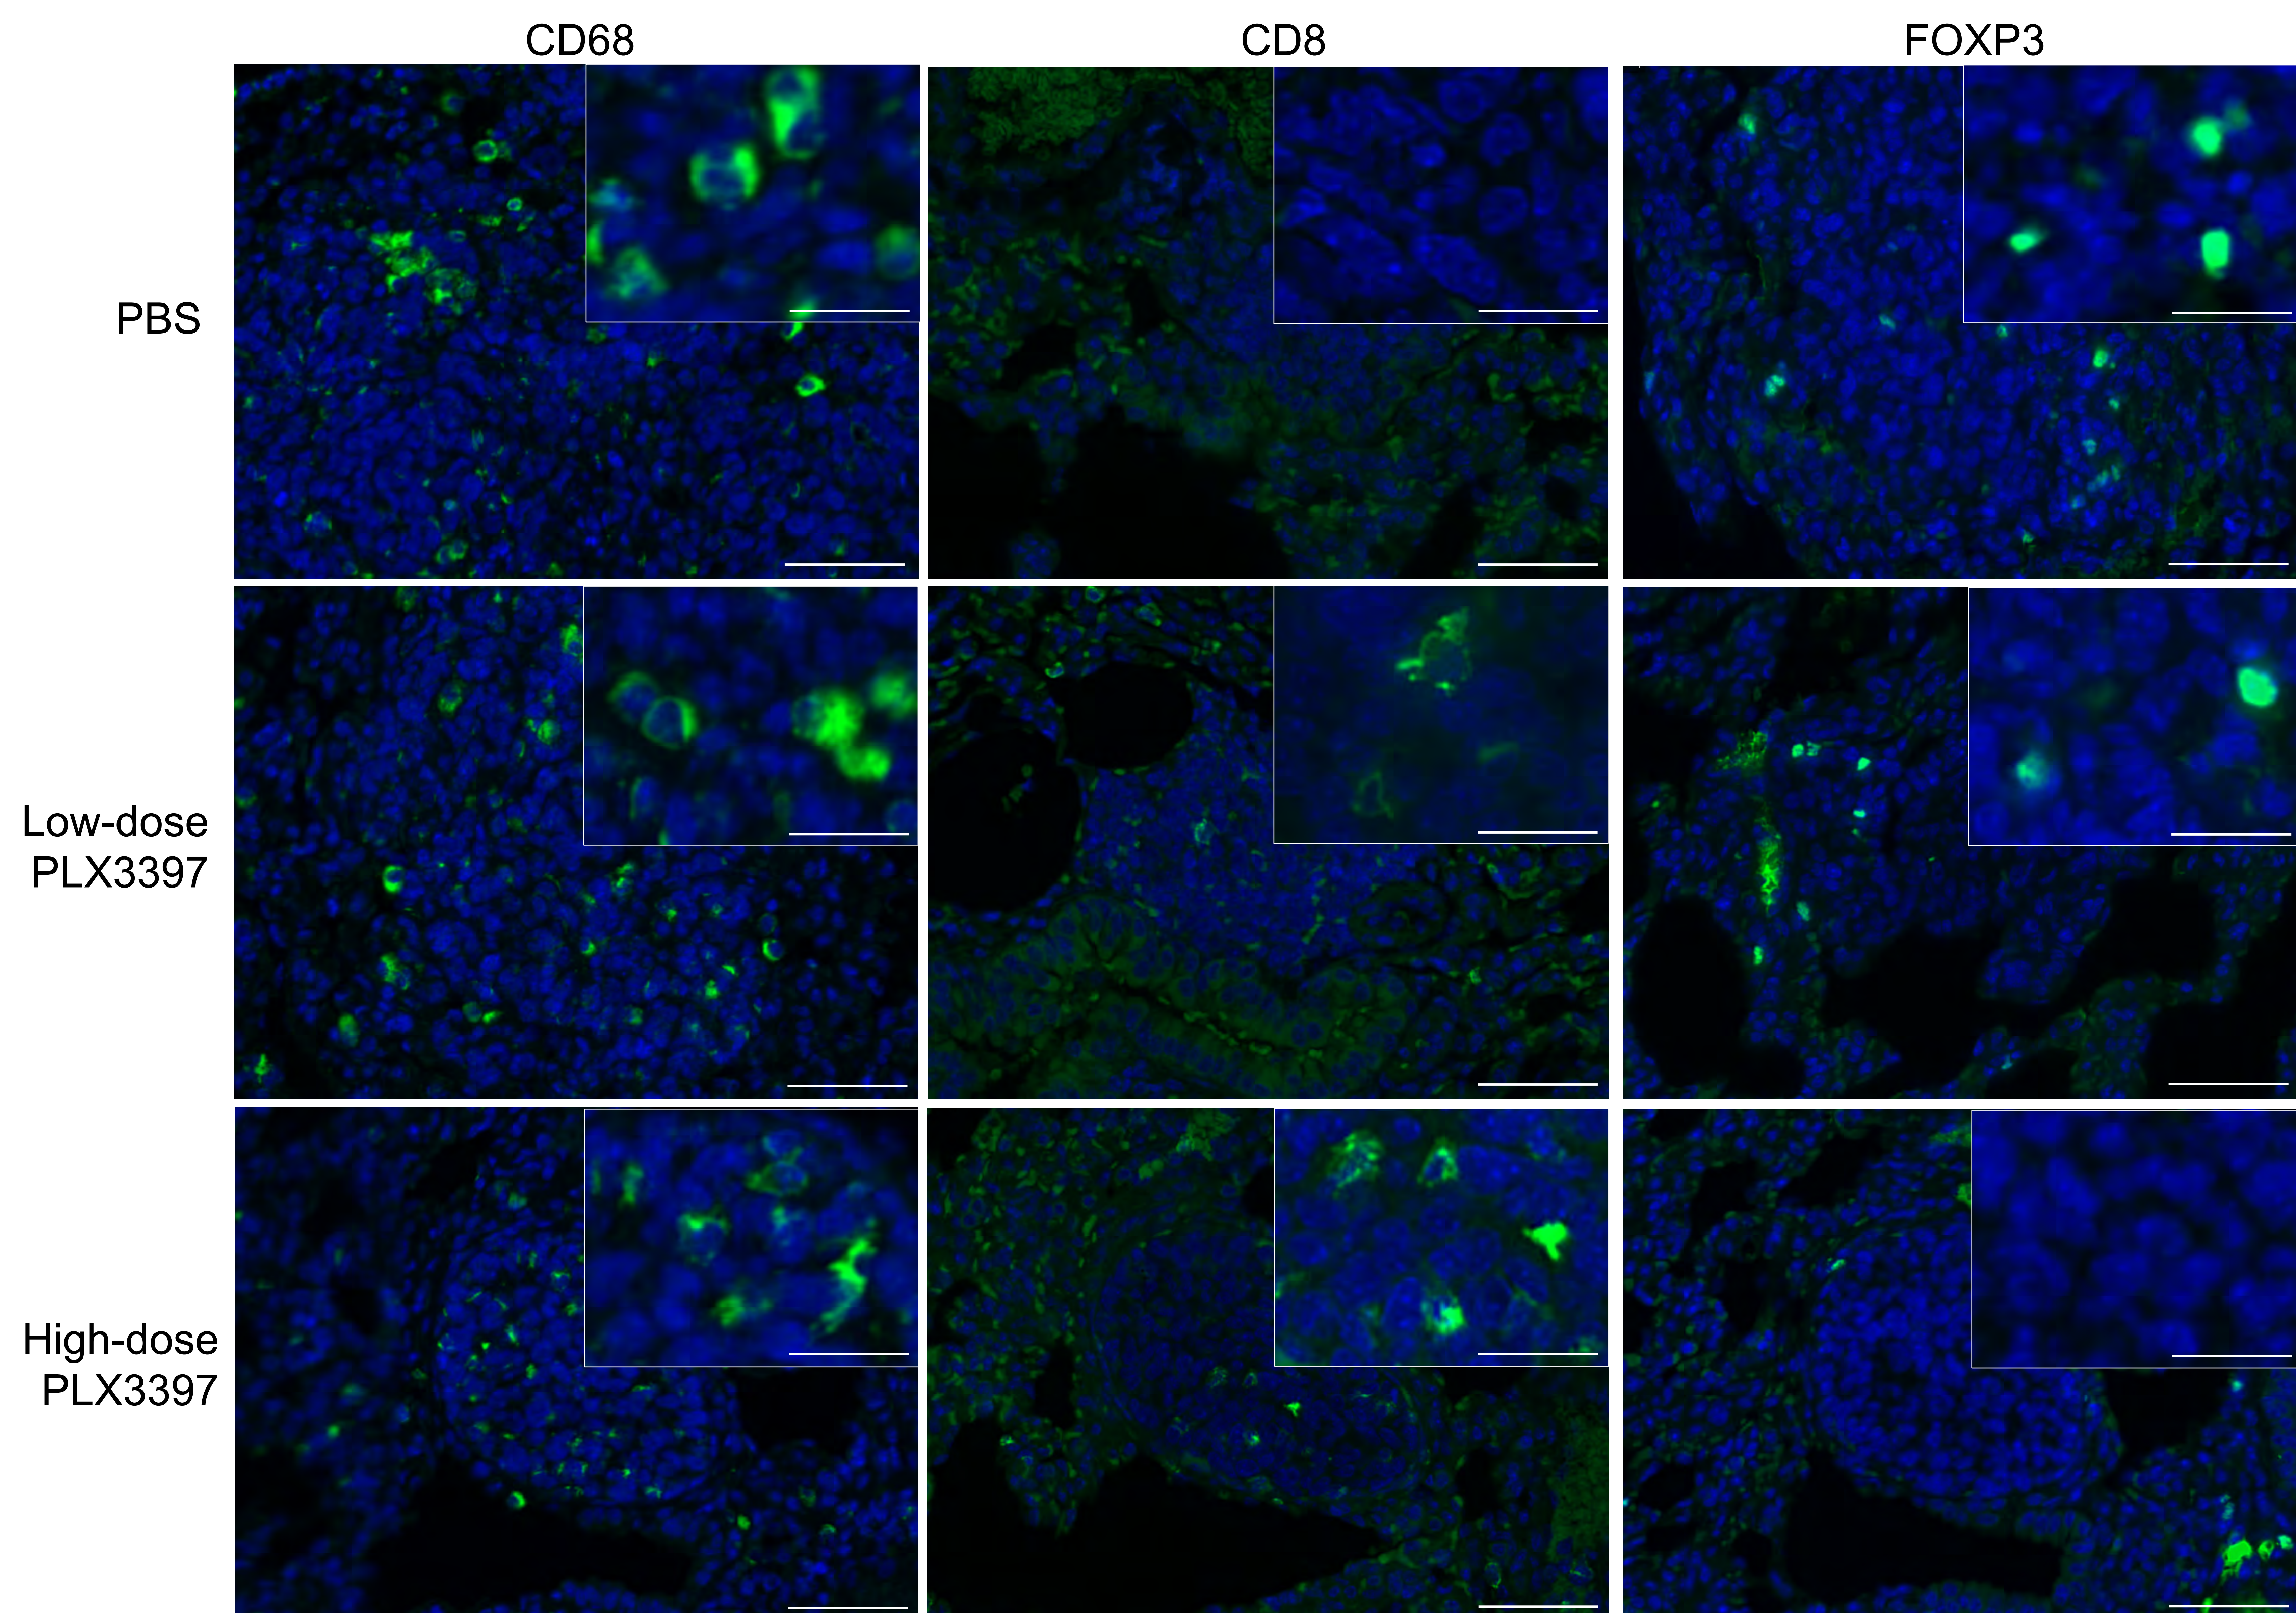

**Supplementary Figure 7.** Fluorescent IHC showing the distribution of infiltrating CD68<sup>+</sup> macrophages (green), CD8<sup>+</sup> T cells (green), and FOXP3<sup>+</sup> regulatory T cells (green) in metastatic tumors of PLX3397- or PBS-treated mice. Nuclei were stained with DAPI (blue). Scale bars, 50 μm (lower) and 20 μm (upper).
